# Supplementary material for: Circulating microRNA miR-425-5p Associated with Brain White Matter Lesions and Inflammatory Processes
Source: MDPI journal article supplement (doi:10.3390/ijms25020887), 2024-01-10
Supplement: s1 [file s1]

## **Supplementary Methods and Figures**

### ***Circulating microRNA miR-425-5p as potential regulator of brain white matter lesions through inflammatory processes***

#### **Supplementary Methods**

##### *Verbal memory score NAI (Nuremberg Age Inventory)*

Participants are asked to memorize words read to them (immediate verbal memory score) and are later on presented a list containing the same words and additional distractor words. The number of correctly identified words is summarized to a sum score minus the number of wrongly identified distractor words (delayed verbal memory score). The resulting scores can be interpreted as a measure of short- and long-term memory capacity.

##### *Brain Imaging Data*

For structural MRI data, participants were scanned with a 1.5 Tesla MRI (MAGNETOM Avanto; Siemens Healthcare, Erlangen, Germany) with a T1-weighted magnetization-prepared rapid acquisition gradient echo (MPRAGE) sequence and the following parameters: axial plane, repetition time = 1900 ms, echo time = 3.4 ms, flip angle = 15°, original resolution = 1.0 × 1.0 × 1.0 mm<sup>3</sup>, matrix = 256 × 176, bandwidth = 130 Hz/Pixel [86].

WML were segmented by the lesion growth algorithm as implemented in the LST toolbox version 3.0.0 ([www.statistical-modelling.de/lst.html](http://www.statistical-modelling.de/lst.html)) for SPM (Statistical Parametric Mapping, <https://www.fil.ion.ucl.ac.uk/spm/>) using both the T1-weighted and the FLAIR MRI sequences [88]. We set the initial threshold kappa to 0.25 and used a threshold of 0.5 to generate binary lesion maps based on the obtained probability maps to be able to extract the total lesion volume and the number of lesions present.

##### *Plasma-circulating miRNA data*

Blood samples in TREND-0 were taken from the cubital vein. Serum and plasma samples were stored at -80°C in the Integrated Research Biobank of the University Medicine Greifswald and used in accordance with its regulations.

MiRNA levels were measured in a subsample of TREND-0 participants (n = 708). These individuals have been selected from a TREND-0 subsample of 1000 individuals with additional available genetic and gene-expression information to obtain a maximum overlap of different OMICS layers. As this sample was used for gene-expression analyses, subjects with known

diabetes have been excluded. The subjects for miRNA analysis have been selected to reflect the same age, sex and BMI distribution as in the larger subsample of 1000 individuals. MiRNAs were prepared from 200µl EDTA plasma using the miRCURY™ RNA Isolation Kit –Biofluids (Qiagen, Hilden, Germany) and were measured in two batches (batch 1: n = 371; batch 2: n = 337).

The laboratory workflow involved several quality control steps. First, to ensure high and reproducible RNA yield from EDTA-plasma samples, bacteriophage MS2 carrier RNA and the Spike-Ins UniSp2, UniSp4, and UniSp5 were added to each sample during the purification procedure. Reverse transcription reactions were performed and monitored with the Spike-ins UniSp6 and Cel-miR-39 using the Universal cDNA Synthesis Kit II (Qiagen, Hilden, Germany) according to the manufacturer's instructions. Before using RNA samples for miRNA profiling, the presence of Spike-Ins (UniSp2, UniSp4, UniSp5), yield of typical plasma miRNAs, absence of PCR inhibitors (UniSp6, Cel-miR-39) as well as hemolysis in the samples was assessed by use of a microRNA QC PCR Panel V1.M (Qiagen, Hilden, Germany). Samples which did not pass the quality control were excluded from further processing.

For RT-qPCR based miRNA analysis the Serum/ Plasma Focus microRNA PCR Panel (Qiagen, Hilden, Germany) V3.M and V4.M were used, covering 179 miRNAs. The qPCR of the first batch of TREND-0 miRNA samples was performed on the 7900HT Real-Time PCR system and the second batch was performed on the QuantStudio™ 12K Flex Real-Time PCR system (both Thermo Fisher scientific, Waltham, USA). Cycling parameters as recommended by Qiagen were employed in 42 amplification cycles. The amplification curves were analyzed using the SDS 2.4 and Quantstudio Real-time PCR System software version 1.3 (both Thermo Fisher Scientific, Waltham, USA) for determination of Cycle-threshold (Ct) and for melting curve analysis. For each batch, a miRNA was selected for further analysis if  $Ct \leq 37$  was detected in at least 40% of the samples. In order to consider the influence of technical parameters, the Ct values of synthetic spiked-in miRNAs — monitoring the efficiency of miRNA extraction (UniSp2 and the difference between Ct values of UniSp4 and UniSp2) — the interplate calibrator (UniSp3), as well as the storage time of the biosamples (dt\_biobank) were regressed out of the data. Linear regression was performed for each miRNA according to the model  $\Delta Ct \sim \text{UniSp2} + \text{UniSp4-UniSp2} + \text{UniSp3} + \text{dt\_biobank}$ , which treats the  $\Delta Ct$  values as dependent variables and the technical parameters as independent variables. The resulting residuals were used as independent variables in later models to detect associations between miRNAs and phenotypes of interest. A batch was included in the analysis for a specific miRNA if at least 100 subjects contained a valid measurement of the respective miRNA (see supplementary Table S1 for a complete list of miRNAs used).

#### *Genome-wide SNP chip and APOE genotype*

Genome-wide SNP information was taken from the genetic data in SHIP. Genotyping of a subset of the SHIP-TREND subjects (n = 986 subjects that fasted for at least 10 hours prior to blood sampling and had serum fasting glucose levels  $\leq 8\text{mmol/l}$ ; also including the miRNA

sample) was performed using the Illumina Infinium HumanOmni 2.5 Bead Chip. The remaining SHIP-TREND sample (n = 3134) was genotyped using the Illumina Infinium GSA. Imputation of genotypes was performed using the HRCv1.1 reference panel and the Eagle and minimac3 software implemented in the Michigan Imputation Server for pre-phasing and imputation, respectively. For more details, see Völzke and colleagues [70][Klicken oder tippen Sie hier, um Text einzugeben..](#) SNPs with a Hardy–Weinberg-Equilibrium  $p$ -value < 0.0001, a call rate < 0.95, and a MAF < 1% were removed before imputation.

Genome-wide SNP information was taken from the genetic data in TREND-0 (see supplementary methods). The APOE genotypes were determined based on the two SNPs rs429358 (C; T) and rs7412 (T; C) from the resulting imputation (imputation quality > 0.8; Hardy–Weinberg Equilibrium,  $p > 0.05$ ) [87]. As we used the data from the genome-wide SNP chip instead of strand-specific genotyped SNPs for the determination of APOE status, two ambiguous SNP combinations occurred where APOE  $\epsilon 2/\epsilon 4$  and  $\epsilon 1/\epsilon 3$  could not be distinguished from each other (<http://www.snpedia.com/index.php/APOE>; accessed on June 27th 2022). Those participants in TREND-0 were excluded from the APOE analyses (n = 99). Subjects were defined as APOE  $\epsilon 4$  carriers if they had at least one  $\epsilon 4$  allele.

#### Additional Variables

Current depressive symptoms were assessed in TREND-0 using the patient health questionnaire (PHQ-9), a 9-item self-report questionnaire with high reliability and validity with higher values reflecting a higher burden of depressive symptoms. Education measured as the number of schooling years was divided into three categories according to the German school system: less than 10 years, exactly 10 years, and more than 10 years. Smoking status was coded as never/former/current smoker and body mass index (BMI) was calculated as (weight in kg)/(height in m)<sup>2</sup>. HbA1c was measured by high-performance liquid chromatography with spectrophotometric detection (Diamat Analyzer; Bio-Rad, Munich, Germany). Hypertension was defined in case of the intake of antihypertensive medication or systolic/diastolic blood pressure above 140/90 mmHg during the assessment. Haematocrit (HCT) and platelets (PLT) were measured as part of the clinical blood count routine.

#### Supplementary Figures

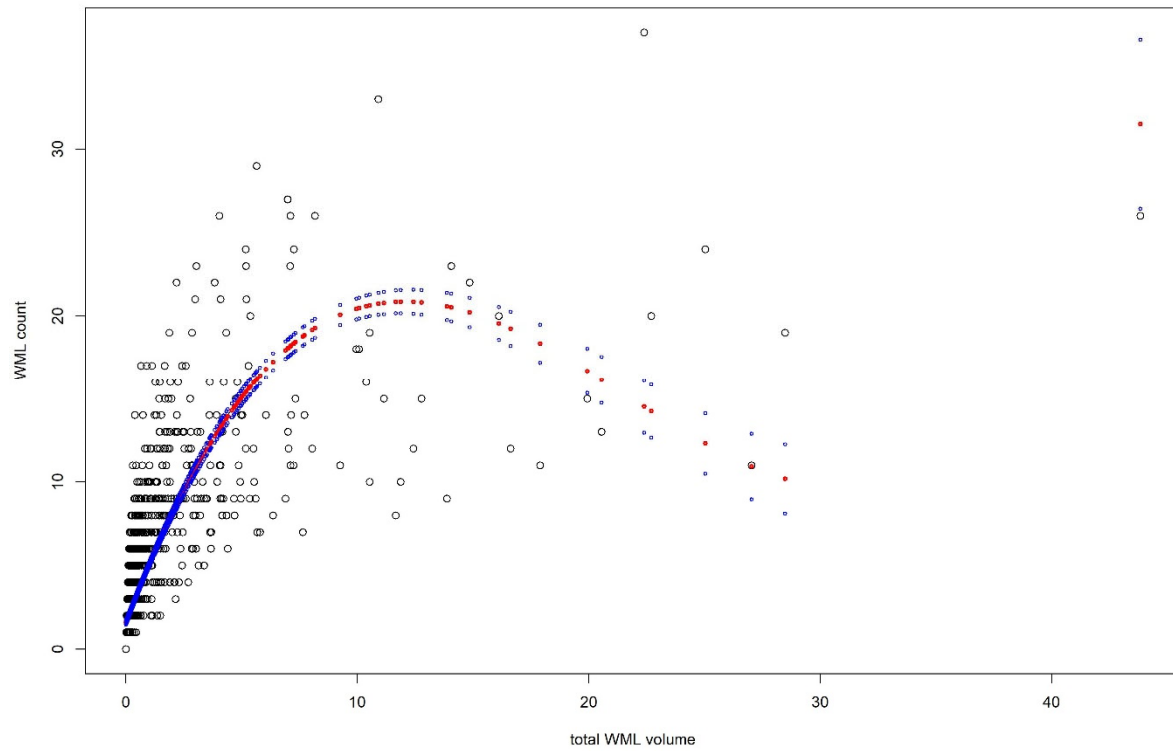

**A**

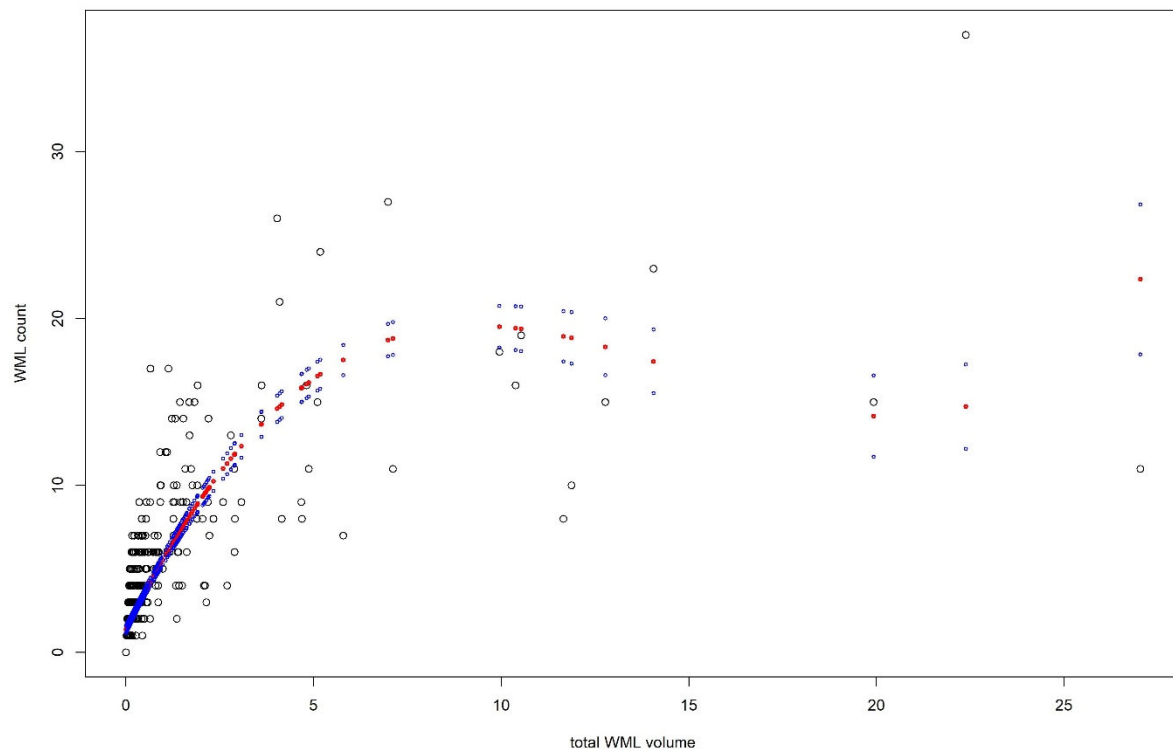

**B**

**Figure S1. A.** Non-linear association between total white matter lesion volume and number (count) of white matter lesions in the TREND-0 MRI sample ( $n = 1854$ ). The red dots represent the predicted non-linear curve, the blue dots the upper and lower bound (95% confidence interval) of the curve. The black dots represent the original data points. Wald test for spline regression coefficients  $p < 0.001$ . **B.** Non-linear association between total white matter lesion volume and number (count) of

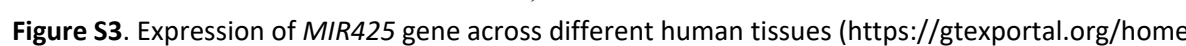

**Figure S3.** Expression of *MIR425* gene across different human tissues (<https://gtexportal.org/home/>).

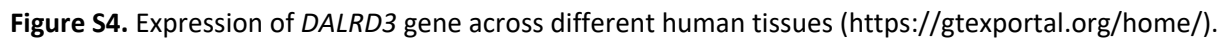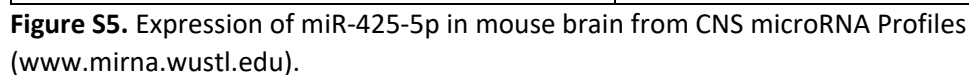

Nearest gene: *DALRD3*  
MAF ranges from 0.11 to 0.11  
View on UCSC, GWAS Catalog, dbSNP

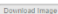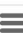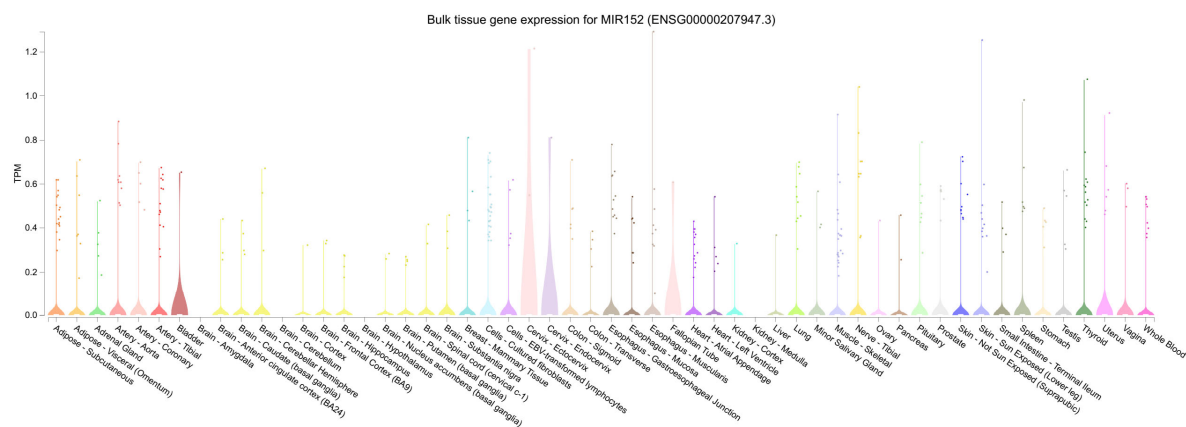





# White matter hyperintensities GWAS

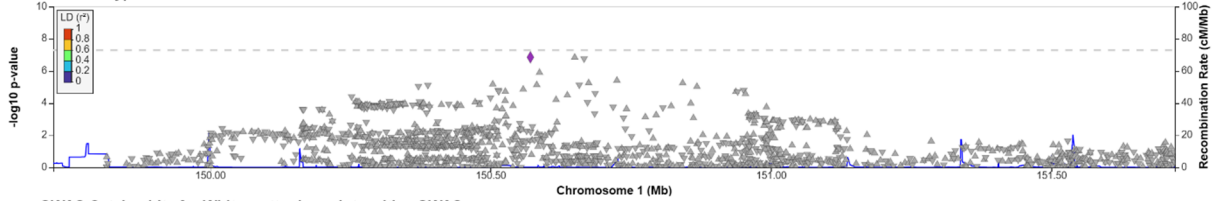

## GWAS Catalog hits for White matter hyperintensities GWAS

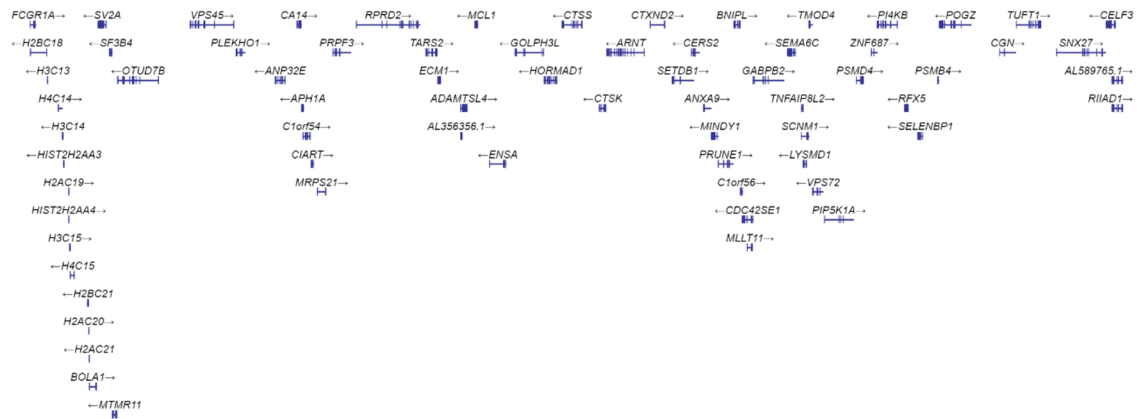

A

# White matter hyperintensities GWAS

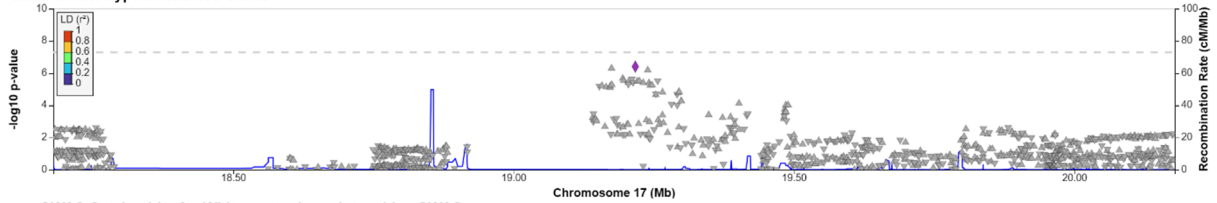

## GWAS Catalog hits for White matter hyperintensities GWAS

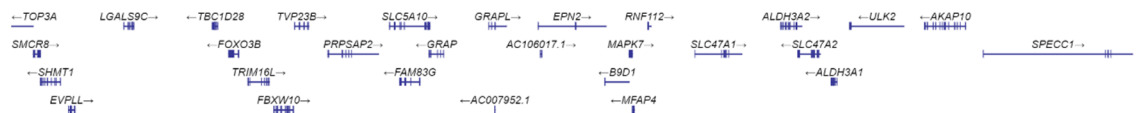

B

# White matter hyperintensities GWAS

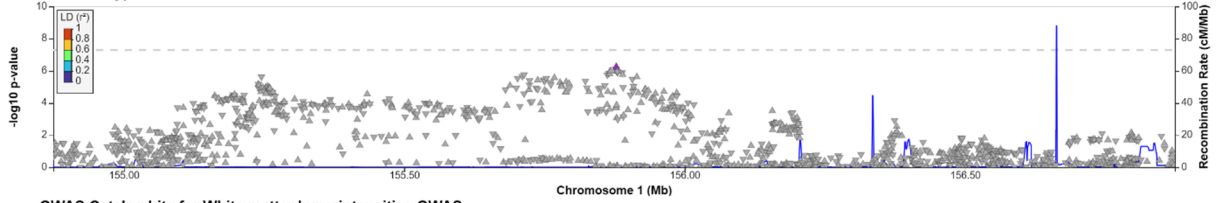

## GWAS Catalog hits for White matter hyperintensities GWAS

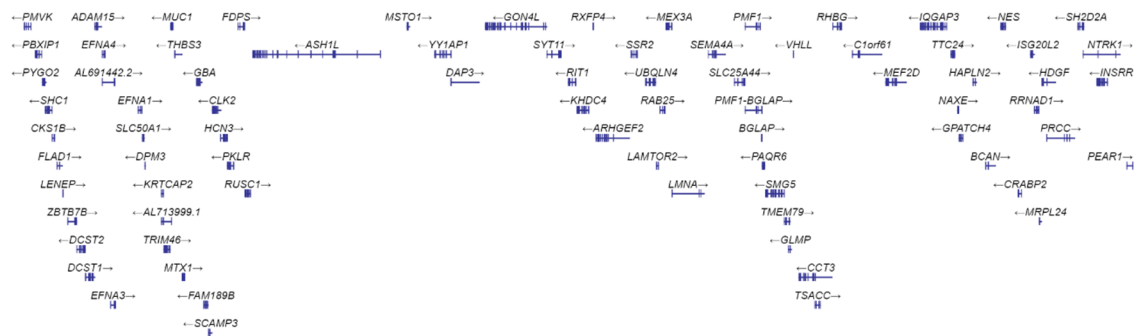

C



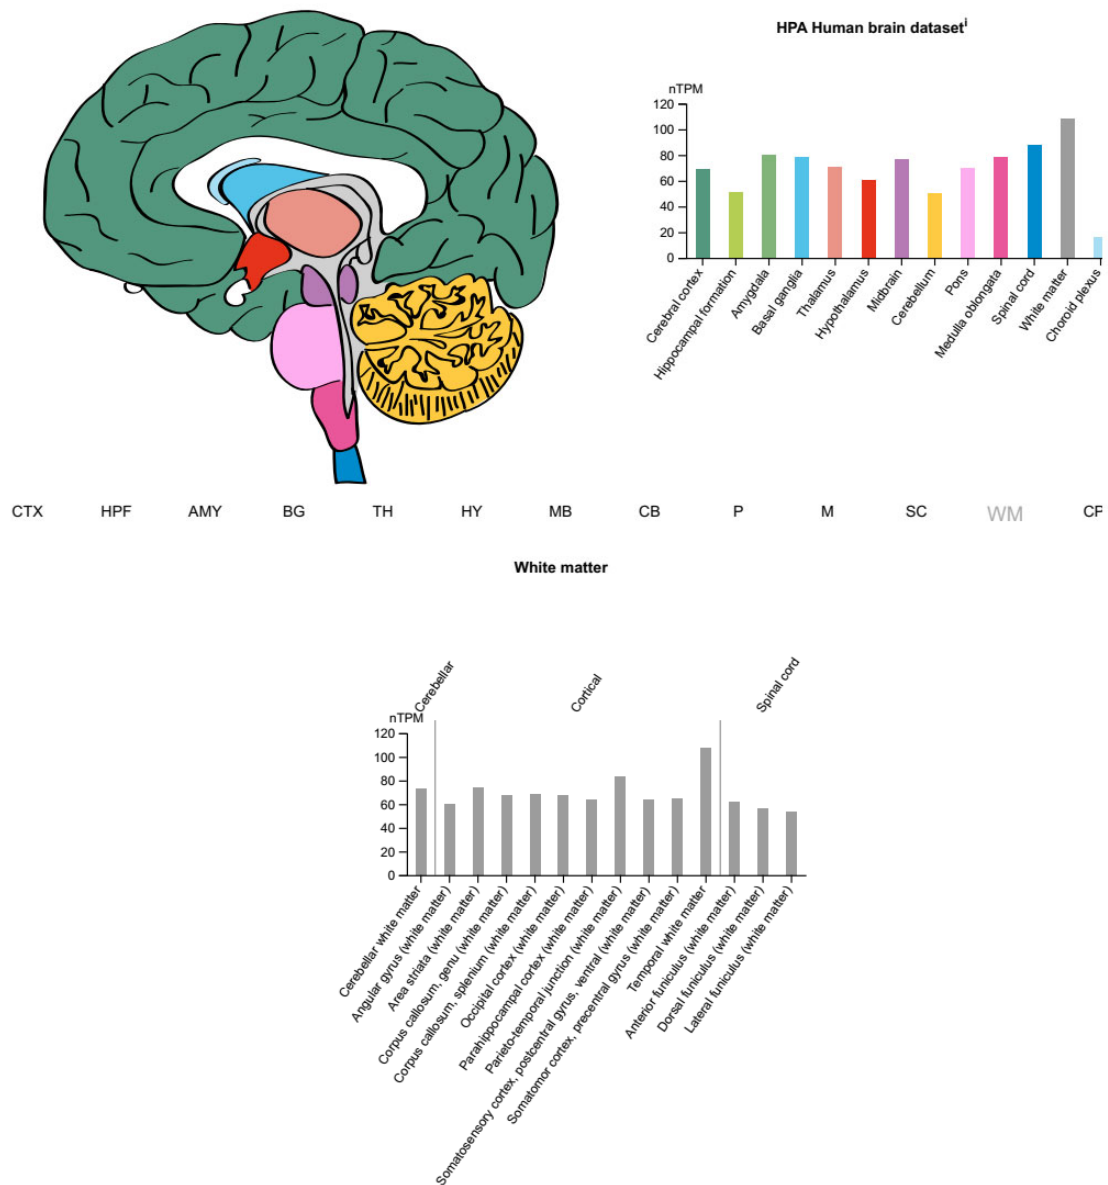

**Figure S13.** Expression of *SH3PXD2A* gene across different brain regions and tissues (detailed for white matter) from The Human Protein Atlas (<https://www.proteinatlas.org/>), (nTPM = number of transcripts per million).

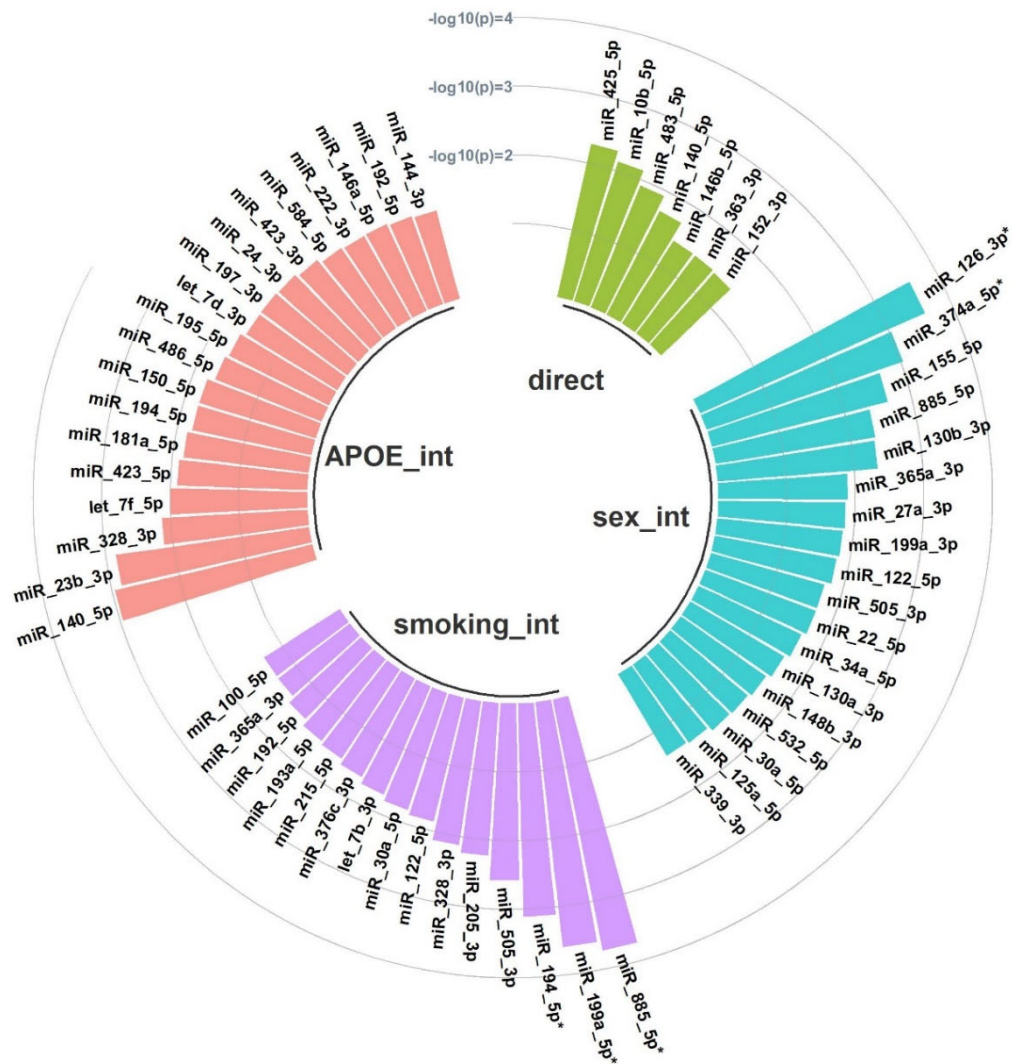

**Figure S14.** All miRNA with at least nominal significance in the different direct and interaction models on the number of white matter lesions in TREND-O. Direct: direct association between WMLs and miRNAs; sex\_int: sex interaction model; smoking\_int: smoking interaction model; APOE\_int: APOE interaction model.

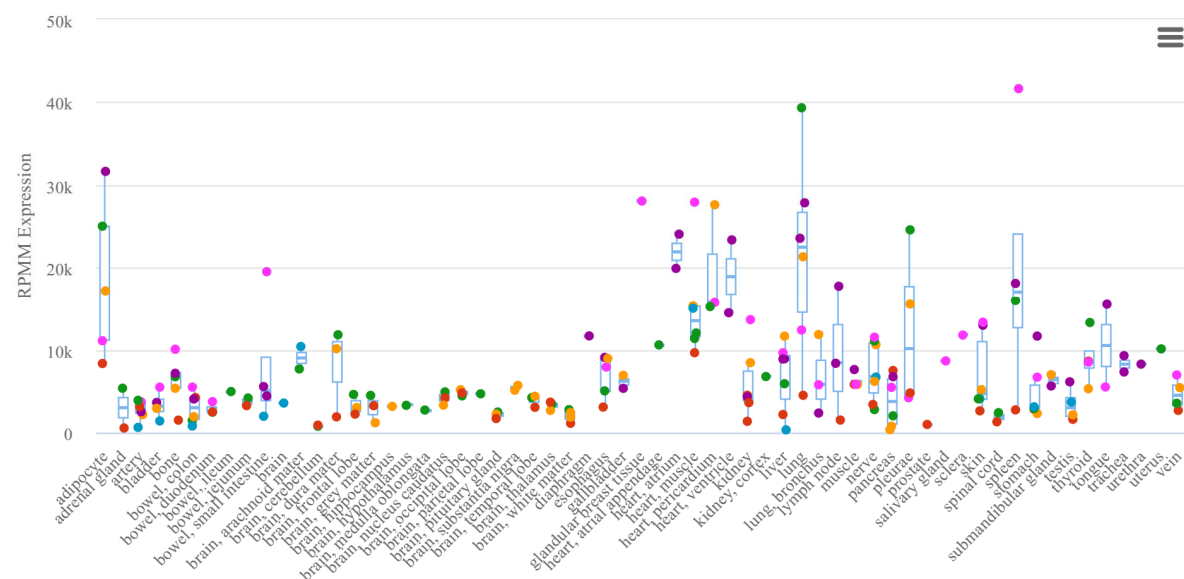

A

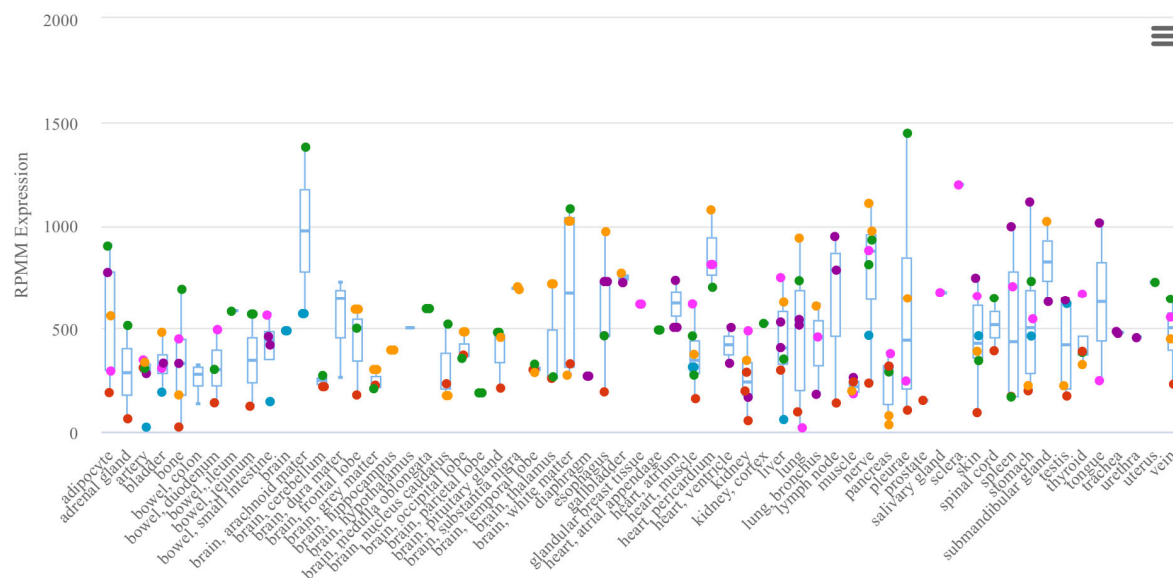

B

**Figure S15. A.** Expression of miRNA *hsa-miR-126-3p* significant in the sex interaction model in different tissues (<https://ccb-web.cs.uni-saarland.de/tissueatlas2/>). **B.** Expression of miRNA *hsa-miR-374a-5p* significant in the sex interaction model in different tissues (<https://ccb-web.cs.uni-saarland.de/tissueatlas2/>).

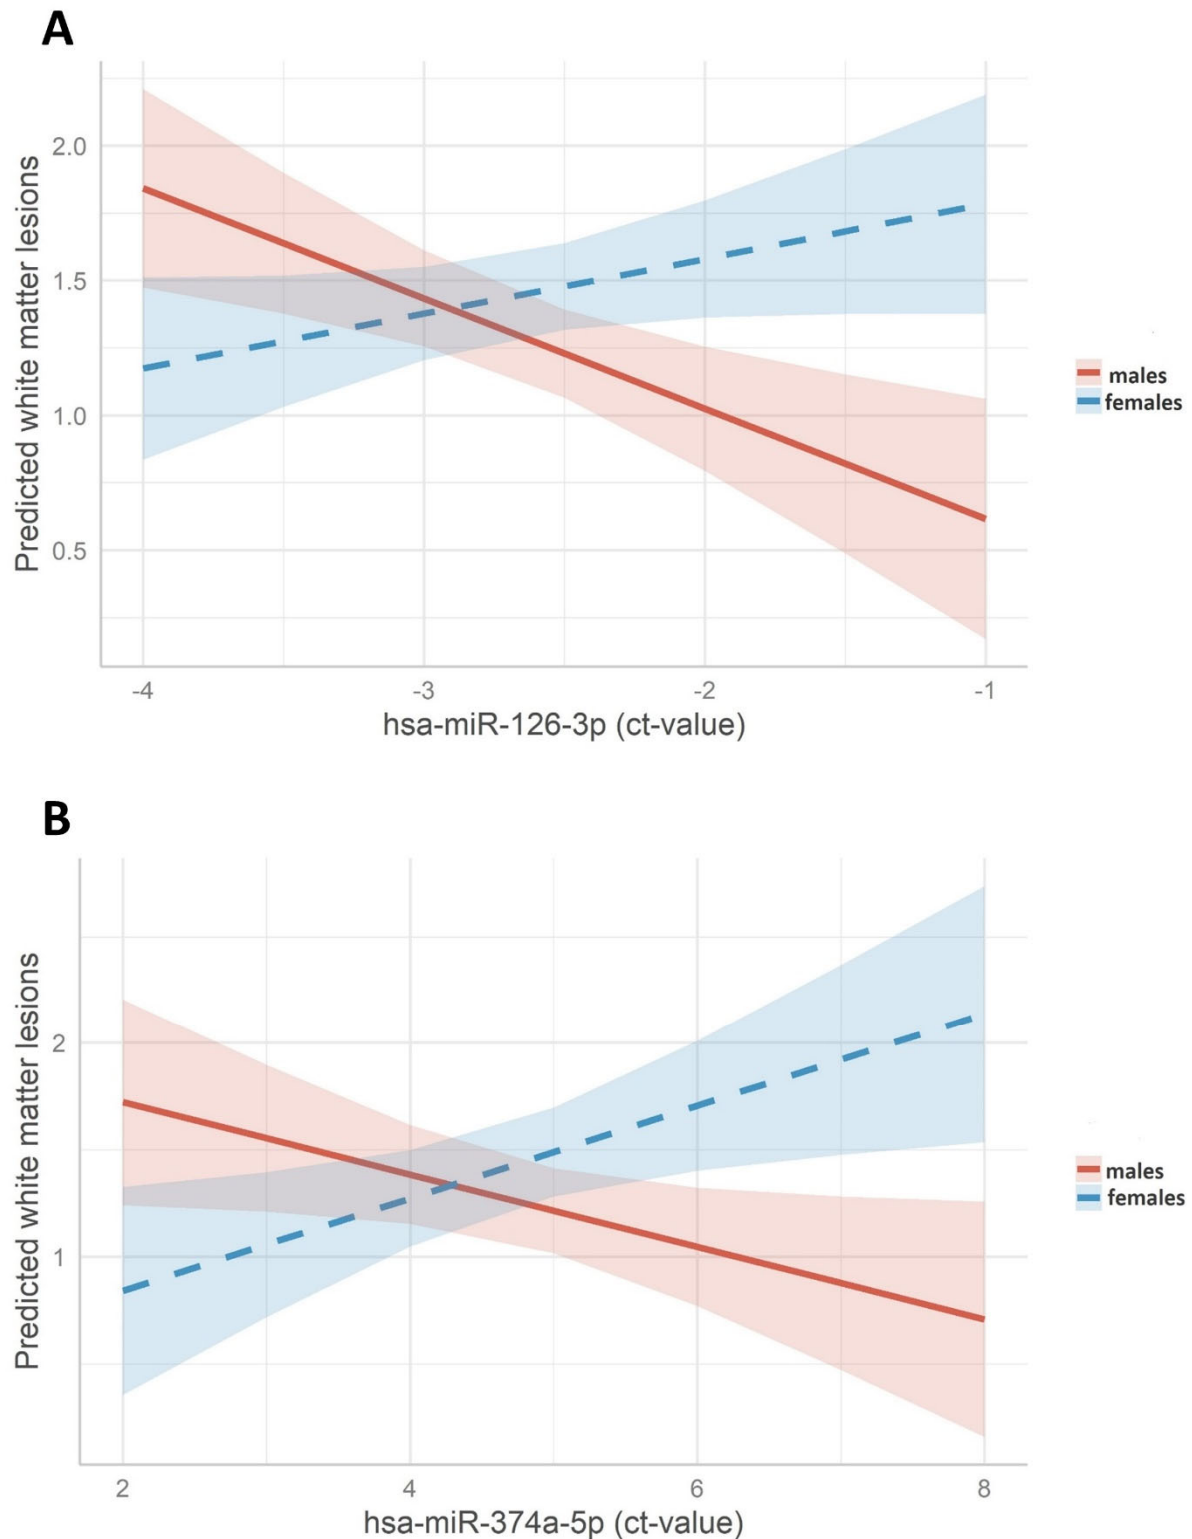

**Figure S16.** Interaction analysis between sex and miRNA abundance on number of WMLs. (A) *hsa-miR-126-3p*, (B) *hsa-miR-374a-5p*; in both cases lower miRNA abundance was associated with a beneficial outcome for number of white matter lesions in males but with a higher WML burden in females. Values on the x-axis refer to  $\Delta$ Ct-values ( $\Delta$ Ct-values > 0: lower abundance with phenotype,  $\Delta$ Ct-values < 0: higher abundance with phenotype).

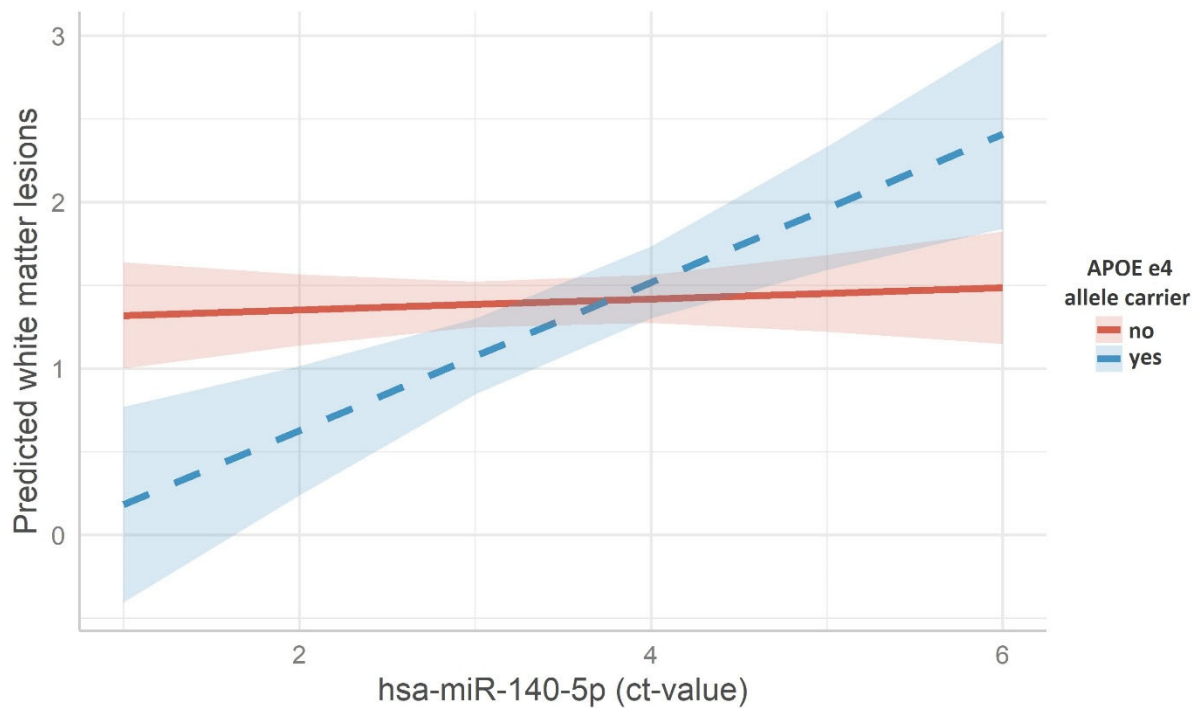

**Figure S17.** Interaction model between *hsa-miR-140-5p* and *APOE*  $\epsilon 4$  carrier status on number of white matter lesions. The number of WMLs has been log-transformed ( $\log(\#WMLs + 1)$ ). Values on the x-axis refer to  $\Delta Ct$ -values ( $\Delta Ct$ -values  $> 0$ : lower abundance with phenotype,  $\Delta Ct$ -values  $< 0$ : higher abundance with phenotype).

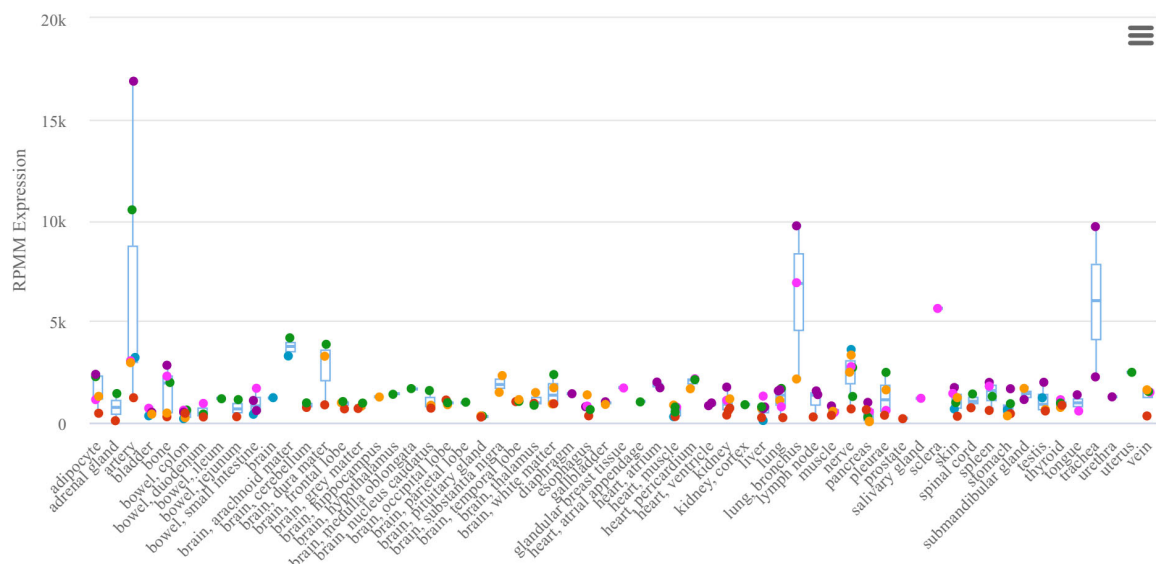

**Figure S18.** Expression of miRNA *hsa-miR-140-5p* in different tissues (<https://ccb-web.cs.uni-saarland.de/tissueatlas2/>).



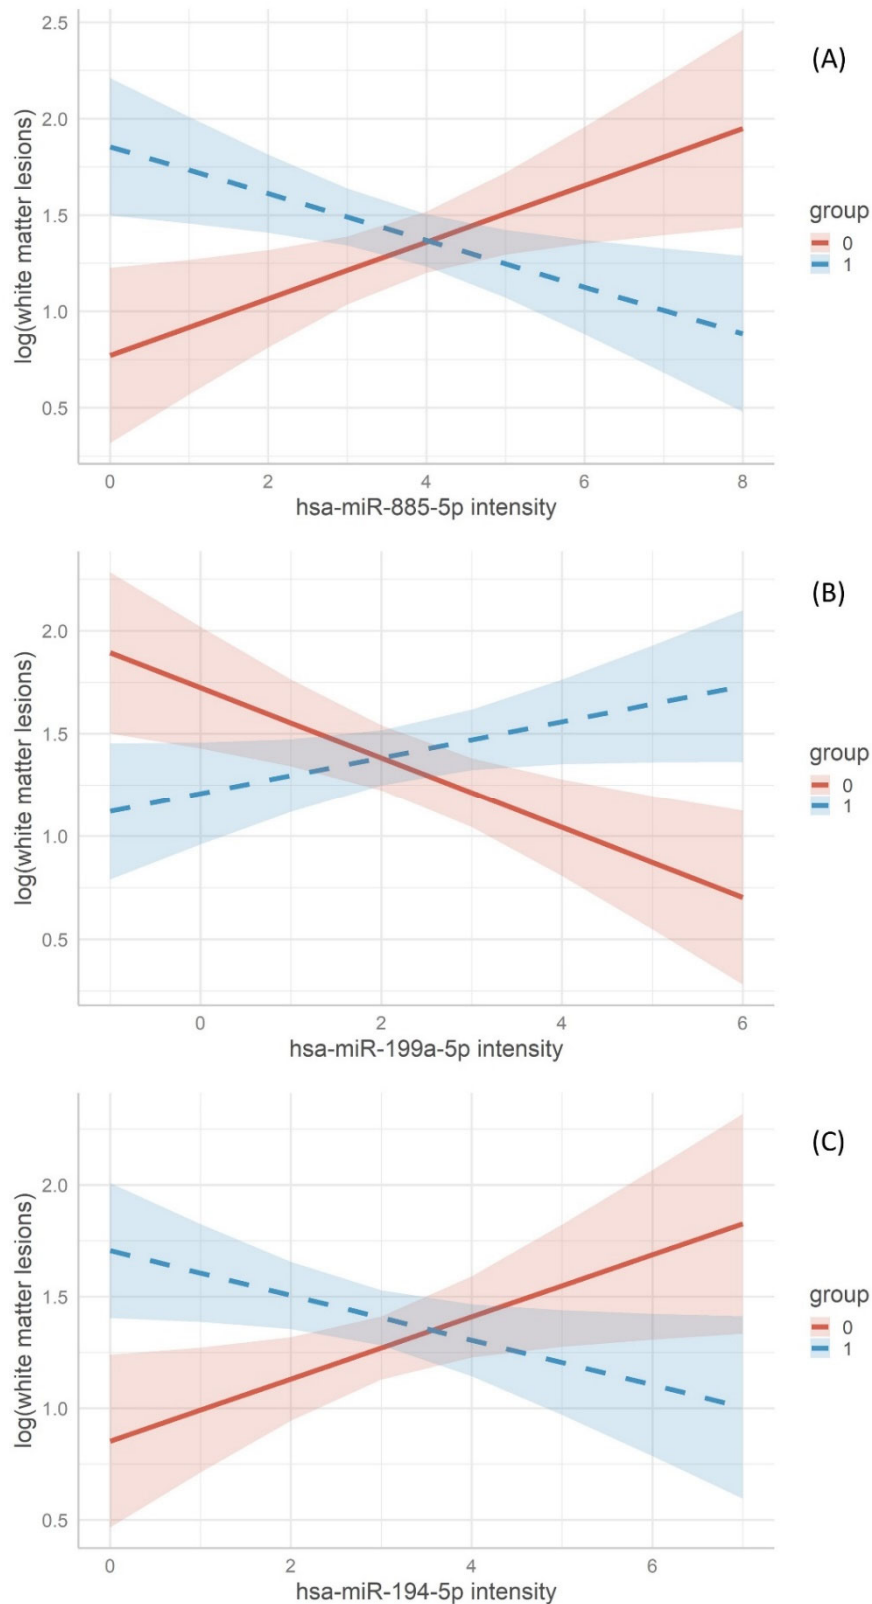

**Figure S19.** Interaction model between different miRNAs and smoking status on number of white matter lesions. On the x-axis  $\Delta Ct$ -values are displayed. The number of WMLs has been log-transformed ( $\log(\#WMLs + 1)$ ). 0: never smokers, 1: ever smokers. Values on the x-axis refer to  $\Delta Ct$ -values ( $\Delta Ct$ -values  $> 0$ : lower abundance with phenotype,  $\Delta Ct$ -values  $< 0$ : higher abundance with phenotype). (A) *hsa-miR-885-5p*, (B) *hsa-miR-199a-5p*, (C) *hsa-miR-194-5p*.



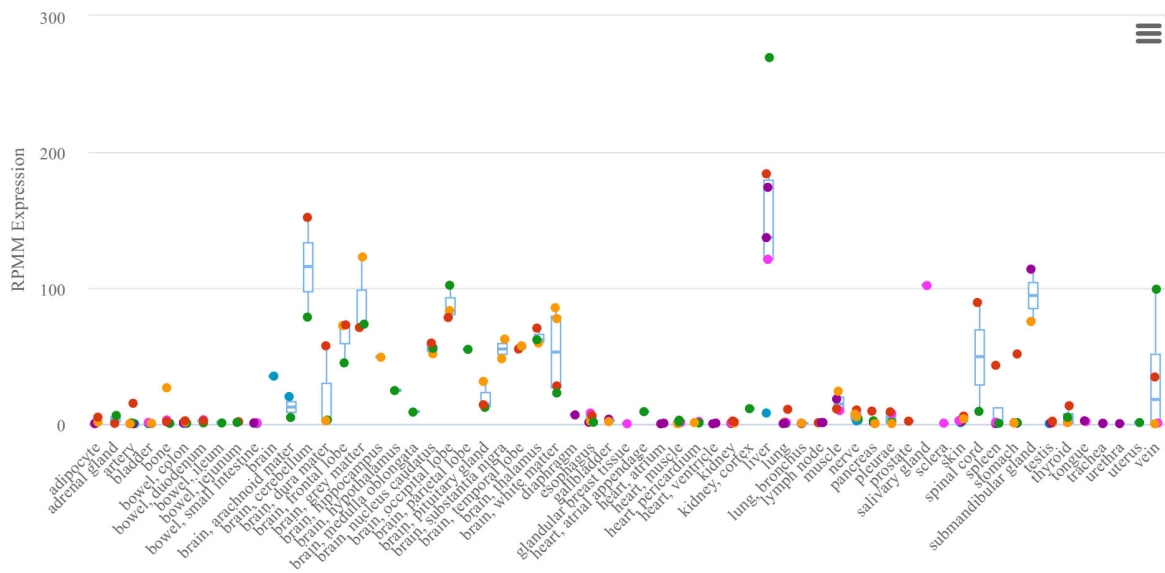

A

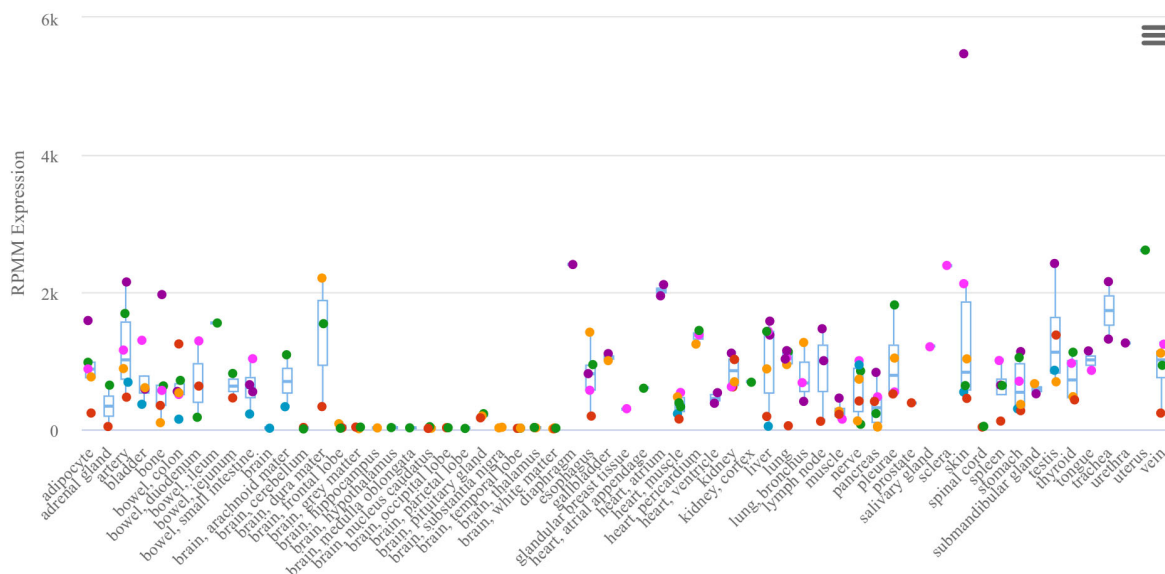

B
